1 ***Lelliottia amnigena* recovered from the lung of a harbour porpoise, and comparative**  
2 **analyses with *Lelliottia* spp.**

3

4 David Negus<sup>1</sup>, Geoffrey Foster<sup>2</sup>, Lesley Hoyles<sup>1</sup>#

5

6 <sup>1</sup> Department of Biosciences, Nottingham Trent University, UK

7 <sup>2</sup> SRUC Veterinary Services, Inverness, UK

8

9 # **Correspondence:** Lesley Hoyles, Department of Biosciences, Nottingham Trent

10 University, Nottingham NG11 8NS, UK; telephone +44 (0)115 848 3429; email

11 [lesley.hoyles@ntu.ac.uk](mailto:lesley.hoyles@ntu.ac.uk).

12

13 **Running title:** *Lelliottia amnigena* comparative analyses

14

15 **Keywords:** *bla*<sub>LAQ</sub>, AmpC, veterinary microbiology, marine, antimicrobial resistance,

16 *Huaxiibacter*

17

18 **Abbreviations:** AMR, antimicrobial resistance; ANI, average nucleotide identity; EUCAST,

19 European Committee on Antimicrobial Susceptibility Testing; MAG, metagenome-

20 assembled genome; rMLST, ribosomal multi-locus sequence typing.

21

22 Supplementary material associated with this article is available from figshare:

23 [https://figshare.com/projects/Lelliottia\\_amnigena\\_characterization/174210](https://figshare.com/projects/Lelliottia_amnigena_characterization/174210).

24

25 The whole-genome sequence data generated for this study are available from BioProject

26 PRJNA979992.

27

28 **ABSTRACT**

29 Strain M1325/93/1 (= GFKo1) of *Lelliottia amnigena* was isolated from the lung of a harbour  
30 porpoise in 1993. The genome sequence and antimicrobial resistance profile (genomic,  
31 phenotypic) of the strain were generated, with the genomic data compared with those from  
32 closely related bacteria. We demonstrate the recently described chromosomally-encoded  
33 AmpC  $\beta$ -lactamase *bla*<sub>LAQ</sub> is a core gene of *L. amnigena*, and suggest new variants of this  
34 class of lactamase are encoded by other members of the genus *Lelliottia*. Although presence  
35 of *bla*<sub>LAQ</sub> is ubiquitous across the currently sequenced members of *L. amnigena*, we highlight  
36 that strain GFKo1 is sensitive to ampicillin and cephalosporins. These data suggest *bla*<sub>LAQ</sub>  
37 may act as a useful genetic marker for identification of *L. amnigena* strains, but its presence  
38 may not correlate with expected phenotypic resistances. Further studies are required to  
39 determine the regulatory mechanisms of *bla*<sub>LAQ</sub> in *L. amnigena*.

40

## 41 INTRODUCTION

42 *Lelliottia* spp. are Gram-negative, facultatively anaerobic bacteria of the family  
43 *Enterobacteriaceae*. The genus *Lelliottia* was created to accommodate species distinct from  
44 *Enterobacter sensu lato* based on *gyrB*, *rpoB*, *infB* and *atpD* gene sequence analyses, and  
45 comprises four species with validly published names (*Lelliottia amnigena*, *Lelliottia aquatilis*,  
46 *Lelliottia jeotgali* and *Lelliottia nimipressuralis*) and one with a non-valid name (“*Lelliottia*  
47 *steviae*”) (Brady *et al.* 2013; Kämpfer *et al.* 2018; Yuk *et al.* 2018; Lin *et al.* 2022). *Lelliottia*  
48 *aquatilis* represents a later heterotypic synonym of *L. jeotgali*, based on average nucleotide  
49 identity (ANI) and *in silico* DNA–DNA hybridization analyses (Wu and Zong 2019).

50 *Lelliottia* spp. have been associated with the commensal microbiota of flies and the  
51 Asian tiger mosquito (Guégan *et al.* 2020; Wiktorczyk-Kapischke *et al.* 2022), and isolated  
52 from fresh and waste water, soil, plants, air samples and fish (Heinle *et al.* 2018; Kämpfer *et*  
53 *al.* 2018; Yuk *et al.* 2018; Salgueiro *et al.* 2020; Reitter, Neuhaus and Hügler 2021; Leister  
54 and Hügler 2022; Thakur and Gauba 2022; Tran *et al.* 2022; Bilous *et al.* 2023; Suescun-  
55 Sepulveda, Rondón González and Fuentes Lorenzo 2023). Interest in *L. amnigena* is  
56 increasing as this bacterium has been associated with soft rot of economically important  
57 plant crops such as onion and potato (Osei *et al.* 2022). Only rarely have *L. amnigena* and *L.*  
58 *nimipressuralis* been associated with opportunistic disease in humans (Leal-Negredo *et al.*  
59 2017; Martín Guerra, Martín Asenjo and Dueñas Gutiérrez 2018; Choi *et al.* 2021; Legese *et*  
60 *al.* 2022). There are few reports in the literature of the carriage of antimicrobial resistance  
61 (AMR) genes by *Lelliottia* spp., though a new chromosomally-encoded AmpC  $\beta$ -lactamase,  
62 *bla*<sub>LAQ-1</sub>, conferring resistance to ampicillin and several cephalosporins was recently  
63 described for an *L. amnigena* strain isolated from animal farm sewage in China (Li *et al.*  
64 2022; El Zowalaty *et al.* 2023).

65 As part of a study of veterinary isolates thought to belong to the *Klebsiella oxytoca*  
66 complex (Smith-Zaitlik *et al.* 2022), we identified several atypical strains that were shown by  
67 *rpoB* gene sequence analysis to represent a range of different *Enterobacteriaceae* (Smith-  
68 Zaitlik 2021). Here, we report on one such strain recovered from the lung of a harbour  
69 porpoise (*Phocoena phocoena*). Using genome sequence data and comparative analyses,  
70 we demonstrate this is a strain of *L. amnigena* and compare its AMR gene profile with those  
71 of publicly available sequence data for the species.

72

73

## 74 MATERIALS AND METHODS

75 **Isolation and phenotypic characterization of strain.** Strain M1325/93/1 (herein referred to  
76 by our laboratory identifier, GFKo1) was isolated on Columbia sheep blood agar (Oxoid,  
77 Basingstoke, UK) from the lung of a harbour porpoise that was found stranded at Buckie on

78 the southern coastline of the Moray Firth, north-east Scotland in June 1993. Tentative  
79 identification and biochemical characterization of the strain were made using the API 20E  
80 (bioMérieux) strip according to the manufacturer's instructions under aerobic conditions at 37  
81 °C. The isolate was also identified by matrix-assisted laser desorption-ionisation time-of-  
82 flight mass spectroscopy (MALDI-TOF) using the Bruker Microflex™ LT/SH MALDI-TOF MS  
83 Biotyper™. Antimicrobial sensitivity testing was performed by disc diffusion assays following  
84 guidelines from the European Committee on Antimicrobial Susceptibility Testing (EUCAST) v  
85 13.1 for *Enterobacterales*. *Escherichia coli* ATCC 25922 was used as the reference strain for  
86 quality control purposes. All antibiotics were purchased from Oxoid, UK.

87

88 **DNA extraction and sequencing.** DNA was extracted from an overnight culture (aerobic,  
89 37 °C) of strain GFKo1 grown in nutrient broth (Oxoid) using the Qiagen DNeasy Blood and  
90 Tissue Kit (Qiagen). Extracted DNA was adjusted to a concentration of 0.2 ng/μL and treated  
91 using the Nextera XT DNA library preparation kit (Illumina) to produce fragments of  
92 approximately 500 bp. Fragmented and indexed samples were run on the sequencer using  
93 the MiSeq Reagent Kit v2 (Illumina; 250□ bp paired-end reads) following Illumina's  
94 recommended denaturation and loading procedures.

95

96 **Genome assembly and gene annotation.** Raw sequence data were checked using fastqc  
97 v0.11.4 (<https://www.bioinformatics.babraham.ac.uk/projects/fastqc/>); no adapter trimming  
98 was required, and reads had an average Phred score >25. Genome data for strain GFKo1  
99 were assembled using Megahit v1.2.9 (options: --min-contig-len 500 -r), with only contigs  
100 ≥500 nt in length retained. CheckM2 v0.1.3 (Chklovski *et al.* 2022) was used to determine  
101 the completeness and contamination of the genome sequence. Bakta v1.4.2 (database 3.1)  
102 (Schwengers *et al.* 2021) was used to annotate predicted genes within the genome.

103

104 **Accurate identification of genomes.** Ribosomal multi-locus sequence typing (rMLST;  
105 (Jolley *et al.* 2012)) was used to identify the closest relative of strain GFKo1. OAT:OrthoANI  
106 v0.93.1 (Lee *et al.* 2016) was used to determine ANI values for the genome with publicly  
107 available *L. amnigena* genomes and type strains of closest relatives. Identities of publicly  
108 available genome sequences of *L. amnigena* (downloaded from NCBI GenBank on 19  
109 March 2023; **Table 1**) were confirmed by comparison (OAT:OrthoANI) with the genome  
110 sequences of the type strains of the genus. These genomes were checked, annotated and  
111 identified as described above. Sourmash v4.6.1 was used to generate 31-kmer signatures  
112 for genomes, which were compared with one another to determine how similar genomes  
113 were to one another, and to identify genomes belonging to *L. amnigena sensu stricto* (Brown

114 and Irber 2016). PhyloPhlAn3 (--diversity medium) was used to confirm the affiliation of all  
115 genomes with the genus *Lelliottia*.

116

117 **Identification of AMR genes predicted to be encoded in genomes.** Initially, the  
118 Resistance Gene Identifier [RGI 6.0.1, CARD 3.2.6; (Alcock *et al.* 2020)] was used to derive  
119 information on AMR genes predicted to be encoded in the genome of strain GFKo1. The  
120 genome sequence of GFKo1 was also searched for the allele of the chromosomal class C  $\beta$ -  
121 lactamase *bla*<sub>LAQ-1</sub> (nucleotide accession MZ497396; (Li *et al.* 2022)) using Geneious Prime  
122 v2023.0.1. Based on the result of the *bla*<sub>LAQ-1</sub> search, AMRFinderPlus v3.11.4 (database  
123 version 2023-02-23.1) (Feldgarden *et al.* 2022) and Bakta annotations were subsequently  
124 used for surveying AMR genes in genomes.

125 A BLASTP database was created using the amino acid sequence of MZ497396.  
126 Bakta-annotated protein sequences for all genomes (**Table 1**) were searched against this  
127 sequence, with hits >70 % coverage and >70 % identity retained. The 'hit' protein sequences  
128 were extracted from the .faa Bakta-annotated files using Biostrings v2.64.0 and used to  
129 create a multiple-sequence alignment (Clustal Omega v1.2.2; Geneious Prime v2023.0.1)  
130 with the protein sequences of the 12 AmpC  $\beta$ -lactamases (ACT-12, ACT-22, BIL-1, CMY-2,  
131 CMY-20, LAT-1, CFE-1, YRC-1, MIR-1, MIR-23, ACT-6, ACT-10) included in the study in  
132 which the functionality of the *bla*<sub>LAQ-1</sub> protein was demonstrated (Li *et al.* 2022). A  
133 phylogenetic tree was created from the sequence alignment using PhyML v3.3.20180621  
134 (Blosum62 matrix) (Guindon *et al.* 2010), with bootstrap values determined based on 100  
135 replications. The tree was visualized using iTOL v6 (Letunic and Bork 2019) with additional  
136 annotations made using Adobe Illustrator.

137

138

## 139 **RESULTS**

### 140 **Characteristics of genome of GFKo1**

141 Strain GFKo1 was recovered from the lung of a harbour porpoise that stranded in  
142 1993. Although originally thought to represent a strain of *K. oxytoca*, *rpoB* gene sequence  
143 analysis done in the laboratory at Nottingham Trent University showed the strain was a  
144 representative of *L. amnigena* (Smith-Zaitlik 2021). This identification was supported by API  
145 20E data (read after 24 and 48 h; code 1305173: *Enterobacter amnigenus* 1 90.4 %) and by  
146 MALDI-TOF with scores that reached 2.48, significantly above the 2.0 cut-off for species  
147 identification.

148 As *L. amnigena* has not previously been associated with marine mammals and there  
149 are few genome sequences available for the species, we generated the draft genome  
150 sequence of strain GFKo1 (20x coverage). The genome comprised 4,294,992 bp across 200

151 contigs (N50 46,243), and was predicted to encode 3,954 coding sequences, 80 tRNA, 1  
152 tmRNA and 6 ribosomal RNA genes (**Table 1**). This information, together with its high  
153 completeness and low contamination (**Table 1**), demonstrated GFKo1's genome was of high  
154 quality (Bowers *et al.* 2017).

155 rMLST (Jolley *et al.* 2012; Jolley, Bray and Maiden 2018) identified GFKo1 as *L.*  
156 *amnigena* (100 % identity). This is a rapid method that indexes variation of the 53 genes  
157 encoding bacterial ribosome protein subunits to integrate microbial taxonomy and typing.  
158 ANI analysis of GFKo1's genome against the genomes of type strains of the genus *Lelliottia*  
159 confirmed GFKo1 as a strain of *L. amnigena*, sharing 98.31 % ANI with the type strain  
160 (NCTC 12124<sup>T</sup>, assembly accession GCA\_900635465) of the species (Chun *et al.* 2018)  
161 (**Fig. 1a**).

162

### 163 **Curation of *Lelliottia* genome dataset**

164 We downloaded the GenBank genome assemblies of all *Lelliottia* type strains ( $n=5$ )  
165 and all *L. amnigena* ( $n=22$ , excluding *L. amnigena* type) strains from NCBI GenBank (**Table**  
166 **2**). All were checked for completeness and contamination using CheckM2 (**Table 1**). Except  
167 for metagenome-assembled genome (MAG) ERR1430553, all were of high quality (<5 %  
168 contamination, >90 % complete) (Bowers *et al.* 2017).

169 rMLST was used to provide tentative identifications for the *Lelliottia* genome  
170 sequences. As can be seen in **Table 2**, of the 23 genomes identified by NCBI as *L.*  
171 *amnigena*, only 19 were identified as *L. amnigena* with 100 % support by PubMLST, with two  
172 of the MAGs (ERR1430553, ERR1430553) identified as *L. amnigena* with low support  
173 scores. Strain 4928STDY7071390 (accession GCA\_902160115) was identified as *L.*  
174 *nimipressuralis* (93 % support), while strain ZB04 was identified as *Huaxiibacter chinensis*  
175 (96 % support). Notable was identification of the proposed type strain of "*L. steviae*" (Lin *et*  
176 *al.* 2022) as *Pseudoalteromonas arabiensis* (100 % support). *L. jeotgali* is an earlier  
177 heterotypic synonym of *L. aquatilis* (Wu and Zong 2019), so we would expect the genomes  
178 of these species to share high support scores.

179 ANI analysis was undertaken to confirm identities of genomes (not shown). Identities  
180 determined by rMLST were confirmed for all genomes, except for strain A167 (accession  
181 GCA\_021498285). An ANI of <95 % with the genome of the type strain of *L. amnigena*  
182 suggests this strain represents a novel species of *Lelliottia* (Chun *et al.* 2018). The genome  
183 of *L. jeotgali* shared 98.86 % ANI with that of *L. aquatilis*. Sourmash is a rapid method for  
184 computing hash sketches from genomic DNA sequences, and comparing them to each  
185 other. A comparison for sourmash signatures generated for all strains supported our findings  
186 from rMLST and ANI analyses (**Fig. 1b**). The sourmash analysis also confirmed the  
187 affiliation of GFKo1 with *L. amnigena*.

188 The genomes ( $n=19$ ) of *L. amnigena* identified by rMLST to be *L. amnigena* (100 %  
189 support) and sharing ANI of >95 % with the genome of the type strain of *L. amnigena* were  
190 included in a phylogenetic analysis with the genomes of the type strains of *L. aquatilis* and *L.*  
191 *nimipressuralis* (**Fig. 1c**). All isolate-derived genomes clustered with the type strain of *L.*  
192 *amnigena*, while the MAG-derived sequence ERR5094855 clustered with *L. aquatilis* and *L.*  
193 *nimipressuralis*. The phylogenetic analysis confirmed the affiliation of GFKo1 with *L.*  
194 *amnigena*.

195

### 196 **Carriage of *bla*<sub>LAQ-1</sub>-like genes by *L. amnigena***

197 RGI/CARD analysis (loose, strict and perfect matches with protein sequences)  
198 showed strain GFKo1's genome encoded no AMR genes. A pairwise alignment of GFKo1's  
199 genome with the reference allele sequence of *bla*<sub>LAQ-1</sub> (Li *et al.* 2022) showed GFKo1  
200 encoded this class C  $\beta$ -lactamase, sharing 99.3 % nucleotide and 99.5 % amino acid  
201 pairwise identity with the reference sequence (accession MZ497396). In agreement with Li  
202 *et al.* (2022) we found that *bla*<sub>LAQ-1</sub> encoded by GFKo1 had the obligatory serine active site of  
203 the  $\beta$ -lactamase catalytic motif S-V-S-K (serine-valine-serine-lysine) at positions 83–86, the  
204 typical class C  $\beta$ -lactamase motif Y-A-N (tryptophan-alanine-asparagine) at positions 169–  
205 171, D/E (a peptide segment containing two dicarboxylic amino acids) at positions 236–238  
206 and the conserved triad K-T-G (lysine-threonine-glycine) at positions 334–336  
207 (**Supplementary Fig. 1**).

208 It is important to note that Bakta had annotated the *bla*<sub>LAQ</sub> gene on contig 81 of  
209 GFKo1's genome (locus tag GFKo1\_06635). Among its databases, Bakta uses the NCBI  
210 Antimicrobial Resistance Gene Finder (AMRFinderPlus) (Feldgarden *et al.* 2022) to annotate  
211 AMR-associated genes in microbial genomes. In addition to a *bla*<sub>LAQ-1</sub>-like gene,  
212 AMRFinderPlus predicted GFKo1 to encode *vat* (Vat family streptogramin A O-  
213 acetyltransferase; GFKo1\_06890), *catA* (type A chloramphenicol O-acetyltransferase;  
214 GFKo1\_12820) and *oqxB* (multidrug efflux RND transporter permease subunit OqxB;  
215 GFKo1\_19950). Bakta also predicted GFKo1 to encode the following AMR-associated  
216 genes: multidrug efflux MATE transporter EmmdR (GFKo1\_03505); multidrug efflux MFS  
217 transporter EmrD (GFKo1\_03800); Bcr/CflA family efflux transporter (GFKo1\_04835); MdtK  
218 family multidrug efflux MATE transporter (GFKo1\_04850); MATE efflux family protein  
219 (GFKo1\_06250); multidrug efflux pump accessory protein AcrZ (GFKo1\_15865); macrolide-  
220 specific efflux protein MacA (GFKo1\_16470); putative aminoglycoside efflux pump  
221 (GFKo1\_16810); multidrug efflux pump subunit AcrB (GFKo1\_17175); multidrug efflux RND  
222 transporter periplasmic adaptor subunit AcrA (GFKo1\_17180); multidrug efflux transporter  
223 transcriptional repressor AcrR (GFKo1\_17185).

224 A BLASTP search of the predicted proteins in each of the genomes listed in **Table 1**  
225 against the amino acid sequence (380 aa) of the Bla<sub>LAQ-1</sub> reference sequence identified one  
226 hit in each genome that shared >70 % identity and 100 % coverage with MZ497396  
227 (**Supplementary Table 1**). The 'hit' sequences were extracted from the Bakta annotation  
228 files (available as **Supplementary Material**) for the genomes and used to create a multiple  
229 sequence alignment with the AmpC reference sequences included in the original  
230 characterization of bla<sub>LAQ-1</sub> (Li *et al.* 2022). A phylogenetic analysis (maximum likelihood)  
231 demonstrated all the *L. amnigena* sequences clustered together (**Fig. 2**), sharing pairwise  
232 identity values of 98.16–99.47 % with Bla<sub>LAQ-1</sub> of P13 and 97.63–100 % with each other  
233 (**Supplementary Table 2**), and high bootstrap support (97 %). The sequence of strain A167  
234 (accession GCA\_021498285) formed a branch on its own (100 % bootstrap support),  
235 providing additional support that this strain represents a novel species of *Lelliottia* (93.42 %  
236 amino acid identity with P13's Bla<sub>LAQ-1</sub> sequence). The sequences derived from *H. chinensis*  
237 strains clustered together but apart from the *L. amnigena* sequences, as did those of *L.*  
238 *nimipressuralis*, and those of *L. aquatilis* and *L. jeotgali* (all with 100 % bootstrap support).

239

#### 240 **Phenotypic resistance profile of *L. amnigena* GFKo1**

241 Disc diffusion assays were performed against antibiotics from a range of classes to  
242 determine the phenotypic resistance profile of *L. amnigena* GFKo1. Strain GFKo1 was found  
243 to be clinically sensitive to all antibiotics tested: penicillins (ampicillin, ampicillin-sulbactam,  
244 piperacillin, amoxicillin-clavulanate, piperacillin-tazobactam); cephalosporins (cefoxitin,  
245 ceftazidime, cefepime, cefotaxime, ceftriaxone); carbapenems (imipenem, meropenem,  
246 ertapenem); the monobactam aztreonam; the aminoglycosides amikacin and gentamicin; the  
247 fluoroquinolones ciprofloxacin and norfloxacin; the tetracyclines tigecycline and tetracycline;  
248 and trimethoprim and sulphamethoxazole- trimethoprim. A full table of results, including zone  
249 diameters measured and breakpoints can be found in **Supplementary Table 3**.

250

251

#### 252 **DISCUSSION**

253 In this study, we have characterized the genome and AMR genotype/phenotype of a  
254 strain of *L. amnigena* (GFKo1) isolated from the lung of a harbour porpoise stranded in  
255 1993. We compared the genome of GFKo1 with genomes of closely related species (**Figure**  
256 **1**, **Table 1** and **Table 2**), and demonstrated that bla<sub>LAQ</sub>, a chromosomally-encoded AmpC β-  
257 lactamase conferring resistance to penicillin G, ampicillin and several cephalosporins (Li *et*  
258 *al.* 2022), is a core gene of *L. amnigena* (**Figure 2**). Phenotypically, GFKo1 was sensitive to  
259 all antibiotics it was tested against, including ampicillin, cefotaxime and ceftazidime  
260 (**Supplementary Table 3**).



261 Our detailed genome-based identification of *L. amnigena* genomes ( $n=20$  isolates;  
262  $n=3$  MAGs) downloaded from GenBank highlighted misclassification problems with four of  
263 the genomes, including that of a proposed type strain for “*L. steviae*” (Lin *et al.* 2022)  
264 (**Figure 1, Table 2**). While NCBI classifies some genome assemblies as anomalous and  
265 excludes them from the RefSeq database based on a range of different criteria, these  
266 assemblies are still available for download from GenBank. *Lelliottia* spp. data within NCBI  
267 GenBank are derived from isolates and MAGs, with no information provided as to, for  
268 example, the completeness and contamination of the genomes compared with accepted  
269 standards (Bowers *et al.* 2017). We have previously encountered problems with taxonomic  
270 assignments provided by NCBI (though acknowledge annotations are improving and being  
271 updated constantly; (Chen *et al.* 2020)). However, we still recommend that, for informative  
272 and accurate comparative genomic analyses to be undertaken, it is important that the  
273 genomes of all bacteria retrieved from public repositories are carefully checked for quality  
274 and identity before undertaking in-depth analyses.

275 In addition to identifying  $bla_{LAQ}$  as a core gene of *L. amnigena*, we demonstrated that  
276 proteins sharing high identity with a range of other AmpC  $\beta$ -lactamases were identified  
277 across all genomes included in this study (**Figure 2**). Whether these AmpC  $\beta$ -lactamases  
278 detected in non-*L. amnigena* genomes are functional remains to be determined. With  
279 respect to the  $bla_{LAQ}$  gene of GFKo1, it possessed the canonical motifs and active sites  
280 associated with  $\beta$ -lactamase enzymes. Additionally, it shared 99.5 % amino acid pairwise  
281 identity with LAQ-1 from *L. amnigena* P13 (accession MZ497396). It has been suggested  
282 that LAQ-1 from *L. amnigena* P13 confers resistance to a range of  $\beta$ -lactams, including first-  
283 to fourth-generation cephalosporins. A recombinant *Escherichia coli* clone of the  $\beta$ -  
284 lactamase from a plasmid-borne copy of  $bla_{LAQ-1}$  exhibited increased minimum inhibitory  
285 concentrations (MICs) to a range of antibiotics including ampicillin, cefoxitin, cefazolin,  
286 ceftazidime, cefepime, aztreonam, ticarcillin, piperacillin and cloxacillin. However, these  
287 increased MICs only resulted in clinical resistance to ampicillin, cefoxitin and cefazolin  
288 according to EUCAST guidelines. Despite the high level of sequence similarity between the  
289  $bla_{LAQ}$  gene of GFKo1 and that from P13, *L. amnigena* GFKo1 was sensitive to all antibiotics  
290 tested in our study. Genomic alignment of the two strains showed a high level of sequence  
291 similarity in the region immediately upstream of the  $bla_{LAQ-1}$  gene, suggesting that lack of  
292 activity is not due to a mutation(s) in the promoter region.

293 Despite  $bla_{LAQ}$  being a core gene of all sequenced *L. amnigena* isolates, it is evident  
294 that broad-spectrum resistance to  $\beta$ -lactam antibiotics is not a uniform feature of the species.  
295 Resistance to penicillins is reported frequently, however resistance to specific  
296 cephalosporins is highly variable (Bollet *et al.* 1991; Stock and Wiedemann 2002;  
297 Murugaiyan *et al.* 2015; Li *et al.* 2022). Genome sequence data are rarely available for the

298 strains characterised in these studies, making it impossible to determine the genotypic  
299 factors that contribute to the observed resistant phenotypes.

300 In summary, we show that the chromosomally-encoded AmpC  $\beta$ -lactamase *bla*<sub>LAQ</sub> is  
301 a core gene of *L. amnigena*. However, presence of the *bla*<sub>LAQ</sub> gene does not always  
302 correlate with phenotypic resistance to  $\beta$ -lactam antibiotics. Resistance to specific  
303 cephalosporins appears to be highly variable across the species. The mechanisms  
304 controlling *bla*<sub>LAQ</sub> expression, and the degree to which *bla*<sub>LAQ</sub> contributes to phenotypic  
305 resistance, require further investigation. Studies involving the cloning and expression of  
306 diverse *bla*<sub>LAQ</sub> genes in genetic backgrounds free from other resistance markers will help  
307 elucidate the specificity of these novel  $\beta$ -lactamases and their role in *L. amnigena*.

308  
309

## 310 FUNDING

311 This work used computing resources provided through the Research Contingency  
312 Fund of Nottingham Trent University.

313  
314

## 315 ACKNOWLEDGEMENTS

316 GF isolated the strain and performed phenotypic characterization and antibiotic  
317 sensitivity test work. DN did all library preparation, sequencing and antibiotic sensitivity  
318 testing. LH did all bioinformatics work. DN and LH undertook all data analyses and  
319 interpretation. All authors contributed to the writing of the manuscript, and approved the  
320 submitted version.

321  
322

## 323 REFERENCES

- 324 Alcock BP, Raphenya AR, Lau TTY *et al.* CARD 2020: antibiotic resistome surveillance with the comprehensive  
325 antibiotic resistance database. *Nucleic Acids Res* 2020;**48**:D517–25.
- 326 Bilous S, Likhonov A, Boroday V *et al.* Antifungal activity and effect of plant-associated bacteria on phenolic  
327 synthesis of *Quercus robur* L. *Plants (Basel)* 2023;**12**:1352.
- 328 Bollet C, Elkouby A, Pietri P *et al.* Isolation of *Enterobacter amnigenus* from a heart transplant recipient. *Eur J*  
329 *Clin Microbiol Infect Dis* 1991;**10**:1071–3.
- 330 Bowers RM, Kyrpidis NC, Stepanauskas R *et al.* Minimum information about a single amplified genome (MISAG)  
331 and a metagenome-assembled genome (MIMAG) of bacteria and archaea. *Nat Biotechnol* 2017;**35**:725–31.
- 332 Brady C, Cleenwerck I, Venter S *et al.* Taxonomic evaluation of the genus *Enterobacter* based on multilocus  
333 sequence analysis (MLSA): proposal to reclassify *E. nimipressuralis* and *E. amnigenus* into *Lelliottia* gen.  
334 nov. as *Lelliottia nimipressuralis* comb. nov. and *Lelliottia amnigena* comb. nov., respectively, *E. gergoviae*  
335 and *E. pyrinus* into *Pluralibacter* gen. nov. as *Pluralibacter gergoviae* comb. nov. and *Pluralibacter pyrinus*  
336 comb. nov., respectively, *E. cowanii*, *E. radicincitans*, *E. oryzae* and *E. arachidis* into *Kosakonia* gen. nov. as

- 337 *Kosakonia cowanii* comb. nov., *Kosakonia radicincitans* comb. nov., *Kosakonia oryzae* comb. nov. and  
338 *Kosakonia arachidis* comb. nov., respectively, and *E. turicensis*, *E. helveticus* and *E. pulveris* into  
339 *Cronobacter* as *Cronobacter zurichensis* nom. nov., *Cronobacter helveticus* comb. nov. and *Cronobacter*  
340 *pulveris* comb. nov., respectively, and emended description of the genera *Enterobacter* and *Cronobacter*.  
341 *Syst Appl Microbiol* 2013;**36**:309–19.
- 342 Brown CT, Irber L. sourmash: a library for MinHash sketching of DNA. *Journal of Open Source Software*  
343 2016;**1**:27.
- 344 Chen Y, Brook TC, Soe CZ *et al.* Preterm infants harbour diverse *Klebsiella* populations, including atypical  
345 species that encode and produce an array of antimicrobial resistance- and virulence-associated factors.  
346 *Microb Genom* 2020;**6**, DOI: 10.1099/mgen.0.000377.
- 347 Chklovski A, Parks DH, Woodcroft BJ *et al.* CheckM2: a rapid, scalable and accurate tool for assessing microbial  
348 genome quality using machine learning. 2022:2022.07.11.499243.
- 349 Choi H, Hwang M, Chatterjee P *et al.* Rare *Lelliottia nimipressuralis* from a wound infection case report using  
350 whole genome sequencing-based bacterial identification. *Diagn Microbiol Infect Dis* 2021;**101**:115538.
- 351 Chun J, Oren A, Ventosa A *et al.* Proposed minimal standards for the use of genome data for the taxonomy of  
352 prokaryotes. *Int J Syst Evol Microbiol* 2018;**68**:461–6.
- 353 El Zowalaty ME, Falgenhauer L, Forsythe S *et al.* Draft genome sequences of rare *Lelliottia nimipressuralis* strain  
354 MEZLN61 and two *Enterobacter kobei* strains MEZEK193 and MEZEK194 carrying mobile colistin resistance  
355 *mcr-9* gene isolated from wastewater in South Africa. *J Glob Antimicrob Resist* 2023:S2213-7165(23)00050-  
356 4.
- 357 Feldgarden M, Brover V, Fedorov B *et al.* Curation of the AMRFinderPlus databases: applications, functionality  
358 and impact. *Microbial Genomics* 2022;**8**:000832.
- 359 Guégan M, Tran Van V, Martin E *et al.* Who is eating fructose within the *Aedes albopictus* gut microbiota?  
360 *Environ Microbiol* 2020;**22**:1193–206.
- 361 Guindon S, Dufayard J-F, Lefort V *et al.* New algorithms and methods to estimate maximum-likelihood  
362 phylogenies: assessing the performance of PhyML 3.0. *Syst Biol* 2010;**59**:307–21.
- 363 Heinle CE, Junqueira ACM, Uchida A *et al.* Complete genome sequence of *Lelliottia nimipressuralis* type strain  
364 SGAir0187, isolated from tropical air collected in Singapore. *Genome Announc* 2018;**6**:e00231-18.
- 365 Jolley KA, Bliss CM, Bennett JS *et al.* Ribosomal multilocus sequence typing: universal characterization of  
366 bacteria from domain to strain. *Microbiology (Reading)* 2012;**158**:1005–15.
- 367 Jolley KA, Bray JE, Maiden MCJ. Open-access bacterial population genomics: BIGSdb software, the  
368 PubMLST.org website and their applications. *Wellcome Open Res* 2018;**3**:124.
- 369 Kämpfer P, Glaeser SP, Packroff G *et al.* *Lelliottia aquatilis* sp. nov., isolated from drinking water. *Int J Syst Evol*  
370 *Microbiol* 2018;**68**:2454–61.
- 371 Leal-Negredo A, Castelló-Abieta C, Leiva PS *et al.* Urinary tract infection by *Lelliottia amnigena* (*Enterobacter*  
372 *amnigenus*): an uncommon pathogen. *Rev Esp Quimioter* 2017;**30**:483–4.
- 373 Lee I, Ouk Kim Y, Park S-C *et al.* OrthoANI: an improved algorithm and software for calculating average  
374 nucleotide identity. *Int J Syst Evol Microbiol* 2016;**66**:1100–3.
- 375 Legese MH, Asrat D, Swedberg G *et al.* Sepsis: emerging pathogens and antimicrobial resistance in Ethiopian  
376 referral hospitals. *Antimicrob Resist Infect Control* 2022;**11**:83.
- 377 Leister C, Hügler M. Genome analysis of *Enterobacter asburiae* and *Lelliottia* spp. proliferating in oligotrophic  
378 Drinking water reservoirs and lakes. *Appl Environ Microbiol* 2022;**88**:e0047122.
- 379 Letunic I, Bork P. Interactive Tree Of Life (iTOL) v4: recent updates and new developments. *Nucleic Acids Res*  
380 2019;**47**:W256–9.

- 381 Li A, Yan C, Zhang L *et al.* Characterization and identification of a novel chromosomal class C  $\beta$ -lactamase,  
382 LAQ-1, and comparative genomic analysis of a multidrug resistance plasmid in *Lelliottia amnigena* P13. *Front*  
383 *Microbiol* 2022;**13**:990736.
- 384 Lin J, Huang K, Huang J-Y *et al.* *Lelliottia steviae* sp. nov. isolated from *Stevia rebaudiana* Bertoni. *Arch Microbiol*  
385 2022;**204**:475.
- 386 Martín Guerra JM, Martín Asenjo M, Dueñas Gutiérrez CJ. Pyonephrosis by *Lelliottia amnigena*. *Med Clin (Barc)*  
387 2018;**151**:419–20.
- 388 Murugaiyan J, Krueger K, Roesler U *et al.* Assessment of species and antimicrobial resistance among  
389 *Enterobacteriaceae* isolated from mallard duck faeces. *Environ Monit Assess* 2015;**187**:127.
- 390 Osei R, Yang C, Cui L *et al.* Isolation, identification, and pathogenicity of *Lelliottia amnigena* causing soft rot of  
391 potato tuber in China. *Microb Pathog* 2022;**164**:105441.
- 392 Reitter C, Neuhaus K, Hügler M. Draft genome sequences of *Enterobacter* spp., *Lelliottia* spp., and *Serratia* spp.,  
393 coliform bacteria from drinking water reservoirs and lakes. *Microbiol Resour Announc* 2021;**10**:e0062221.
- 394 Salgueiro V, Manageiro V, Bandarra NM *et al.* Bacterial diversity and antibiotic susceptibility of *Sparus aurata*  
395 from aquaculture. *Microorganisms* 2020;**8**:1343.
- 396 Schwengers O, Jelonek L, Dieckmann MA *et al.* Bakta: rapid and standardized annotation of bacterial genomes  
397 via alignment-free sequence identification. *Microb Genom* 2021;**7**, DOI: 10.1099/mgen.0.000685.
- 398 Smith-Zaitlik T. Bioinformatic and phenotypic characterization of bacteriophages encoded within and infecting  
399 *Klebsiella michiganensis*. MRes thesis, Nottingham Trent University. 2021.
- 400 Smith-Zaitlik T, Shibu P, McCartney AL *et al.* Extended genomic analyses of the broad-host-range phages  
401 vB\_KmiM-2Di and vB\_KmiM-4Dii reveal slopekviruses have highly conserved genomes. *Microbiology*  
402 (*Reading*) 2022;**168**, DOI: 10.1099/mic.0.001247.
- 403 Stock I, Wiedemann B. Natural antibiotic susceptibility of *Enterobacter amnigenus*, *Enterobacter cancerogenus*,  
404 *Enterobacter gergoviae* and *Enterobacter sakazakii* strains. *Clin Microbiol Infect* 2002;**8**:564–78.
- 405 Suescun-Sepulveda JA, Rondón González F, Fuentes Lorenzo JL. Diversity of culturable bacteria of freshwater  
406 environments from an altitudinal gradient in the eastern Cordillera of Colombia. *FEMS Microbiol Lett*  
407 2023;**370**:fnad037.
- 408 Thakur P, Gauba P. Genomic characterization of *Lelliottia amnigena* PTJIIT1005, a nitrate tolerant strain isolated  
409 from water sample of Yamuna River, Delhi, India. *Microbiol Resour Announc* 2022;**11**:e0022922.
- 410 Tran PN, Md Zoqratt MZH, Michalczyk A *et al.* Genome sequence of *Lelliottia* sp. strain WAP21, isolated from  
411 soil in canola fields in Victoria, Australia. *Microbiol Resour Announc* 2022;**11**:e0101821.
- 412 Wiktorczyk-Kapischke N, Skowron K, Kwiecińska-Piróg J *et al.* Flies as a potential vector of selected alert  
413 pathogens in a hospital environment. *Int J Environ Health Res* 2022;**32**:1868–87.
- 414 Wu W, Zong Z. Genome analysis-based reclassification of *Lelliottia aquatilis* as a later heterotypic synonym of  
415 *Lelliottia jeotgali*. *Int J Syst Evol Microbiol* 2019;**69**:998–1000.
- 416 Yuk K-J, Kim Y-T, Huh C-S *et al.* *Lelliottia jeotgali* sp. nov., isolated from a traditional Korean fermented clam. *Int*  
417 *J Syst Evol Microbiol* 2018;**68**:1725–31.
- 418

419 **Table 1.** Sequence summary statistics for Bakta-annotated genomes included in this study

| Strain                  | Accession       | Source                    | Size (bp) | Contigs | GC content (%) | N50     | CDS  | CheckM2          |                   |
|-------------------------|-----------------|---------------------------|-----------|---------|----------------|---------|------|------------------|-------------------|
|                         |                 |                           |           |         |                |         |      | Completeness (%) | Contamination (%) |
| M1325/93/1 (=GFKo1)     | JAUBKL000000000 | Porpoise lung, UK         | 4294992   | 200     | 53.1           | 46243   | 3954 | 100              | 0.06              |
| 155047 <sup>T</sup>     | GCA_022171985   | Human sputum, China       | 4990088   | 98      | 53.7           | 358667  | 4707 | 100              | 0.20              |
| NCTC 12124 <sup>T</sup> | GCA_900635465   | Soil                      | 4471442   | 1       | 52.9           | 4471442 | 4572 | 100              | 0.23              |
| 6331-17 <sup>T</sup>    | GCA_002923025   | Water, Germany            | 4774414   | 37      | 54.2           | 202682  | 4474 | 100              | 0.00              |
| CCUG 25894 <sup>T</sup> | GCA_004115925   | Elm tree, USA             | 4616251   | 67      | 54.8           | 236780  | 4293 | 100              | 0.05              |
| PFL01 <sup>T</sup>      | GCA_002271215   | Jogaejeotgal, South Korea | 4603334   | 1       | 54.2           | 4603334 | 4237 | 100              | 0.01              |
| LST-1                   | CP063663        | <i>Stevia</i> , China     | 3576481   | 1       | 41.1           | 3576481 | 3187 | 100              | 0.03              |
| JCM 17292 <sup>T</sup>  | GCA_001550155   | Sediment, Arabian Sea     | 4459111   | 26      | 40.9           | 658688  | 4004 | 100              | 0.19              |
| 2017H1G6                | GCA_004331765   | Soil, Denmark             | 4606148   | 90      | 52.7           | 134684  | 4343 | 100              | 0.01              |
| 4928STDY7071390         | GCA_902160115   | Human faeces, UK          | 4467891   | 28      | 55.3           | 476430  | 4119 | 100              | 0.00              |
| A167                    | GCA_021498285   | Soil, Netherlands         | 4662149   | 2       | 52.8           | 4520659 | 4344 | 100              | 0.05              |
| ENT01                   | GCA_025641975   | Soil, USA                 | 4716124   | 59      | 52.9           | 212085  | 4402 | 100              | 1.32              |
| ERR1430553*             | GCA_938039995   | Human faeces, China       | 4361353   | 909     | 53.0           | 5972    | 4272 | 90.45            | 4.58              |
| ERR1430553*             | GCA_905202905   | Human faeces, China       | 3854042   | 799     | 53.4           | 5991    | 3704 | 88.98            | 5.15              |
| ERR5094855*             | GCA_947072025   | Rainbow trout gut, France | 4359307   | 65      | 52.9           | 139247  | 4050 | 99.37            | 0.65              |
| FDAARGOS 1444           | GCA_019047465   | Unknown                   | 4505532   | 1       | 52.8           | 4505532 | 4169 | 100              | 0.15              |
| FDAARGOS 1446           | GCA_019048185   | Unknown                   | 4914411   | 5       | 52.6           | 4591698 | 4772 | 100              | 1.27              |
| FDAARGOS_1445           | GCA_019355955   | Unknown                   | 4599109   | 2       | 52.8           | 4504790 | 4287 | 100              | 0.06              |
| FDAARGOS_395            | GCA_002393405   | Soil, USA                 | 4469608   | 1       | 52.9           | 4469608 | 4130 | 100              | 0.01              |
| INSAq176                | GCA_021441185   | Fish, Portugal            | 4422149   | 193     | 53.2           | 58074   | 4147 | 95.84            | 0.07              |
| JUb66                   | GCA_003752235   | Unknown                   | 4572787   | 1       | 52.9           | 4572787 | 4205 | 100              | 0.02              |
| P13                     | GCA_023970615   | Pig (sewage), China       | 4622385   | 2       | 52.9           | 4555627 | 4316 | 100              | 0.90              |
| PTJIT1005               | GCA_022352085   | Water, India              | 4550713   | 71      | 52.9           | 298940  | 4250 | 100              | 0.08              |
| TZW12                   | GCA_016771075   | Water, Germany            | 4694183   | 26      | 52.5           | 415957  | 4420 | 100              | 0.00              |
| TZW13                   | GCA_016770995   | Water, Germany            | 4830285   | 26      | 52.5           | 337333  | 4622 | 100              | 0.05              |
| TZW14                   | GCA_016770935   | Water, Germany            | 4516381   | 17      | 52.8           | 731232  | 4206 | 100              | 0.01              |
| TZW15                   | GCA_016770975   | Water, Germany            | 4756711   | 36      | 52.6           | 346396  | 4485 | 100              | 0.03              |
| TZW16                   | GCA_016770955   | Water, Germany            | 4756331   | 35      | 52.6           | 346396  | 4481 | 100              | 0.03              |
| UMA3121                 | GCA_013337605   | Forest soil, Portugal     | 4420612   | 19      | 52.9           | 559149  | 4091 | 100              | 0.00              |
| ZB04                    | GCA_001652505   | Midgut of silkworm, China | 4616122   | 1       | 54.3           | 4616122 | 4205 | 100              | 0.03              |

420 \*MAGs; full names ERR1430553\_bin.131\_CONCOCT\_v1.1\_MAG, ERR1430553-bin.48 and ERR5094855\_bin.4\_metaWRAP\_v1.3\_MAG.

421 **Table 2.** Species identities of genomes included in this study as determined using different  
422 methods

| Strain                  | Accession       | NCBI ID                       | rMLST ID, % support             | ANI with type strain genome       |
|-------------------------|-----------------|-------------------------------|---------------------------------|-----------------------------------|
| M1325/93/1 (=GFKo1)     | JAUBKL000000000 | <i>L. amnigena</i>            | <i>L. amnigena</i> 100 %        | <i>L. amnigena</i> 98.31 %        |
| 155047 <sup>†</sup>     | GCA_022171985   | <i>Huaxiibacter chinensis</i> | <i>H. chinensis</i> 100 %       | <i>H. chinensis</i> 100 %         |
| NCTC 12124 <sup>†</sup> | GCA_900635465   | <i>L. amnigena</i>            | <i>L. amnigena</i> 100 %        | <i>L. amnigena</i> 100 %          |
| 6331-17 <sup>†</sup>    | GCA_002923025   | <i>L. aquatilis</i>           | <i>L. aquatilis</i> 100 %       | <i>L. aquatilis</i> 100 %         |
| CCUG 25894 <sup>†</sup> | GCA_004115925   | <i>L. nimipressuralis</i>     | <i>L. nimipressuralis</i> 100 % | <i>L. nimipressuralis</i> 100 %   |
| PFL01 <sup>†</sup>      | GCA_002271215   | <i>L. jeotgali</i>            | <i>L. aquatilis</i> 90 %        | <i>L. jeotgali</i> 100 %          |
| LST-1                   | CP063663        | " <i>L. steviae</i> "         | <i>P. arabiensis</i> 100 %      | <i>P. arabiensis</i> 99.13 %      |
| JCM 17292 <sup>†</sup>  | GCA_001550155   | <i>P. arabiensis</i>          | <i>P. arabiensis</i> 100 %      | <i>P. arabiensis</i> 100 %        |
| 2017H1G6                | GCA_004331765   | <i>L. amnigena</i>            | <i>L. amnigena</i> 100 %        | <i>L. amnigena</i> 98.41 %        |
| 4928STDY7071390         | GCA_902160115   | <i>L. amnigena</i>            | <i>L. nimipressuralis</i> 93 %  | <i>L. nimipressuralis</i> 98.15 % |
| A167                    | GCA_021498285   | <i>L. amnigena</i>            | <i>L. amnigena</i> 100 %        | <i>L. amnigena</i> 93.65 %        |
| ENT01                   | GCA_025641975   | <i>L. amnigena</i>            | <i>L. amnigena</i> 100 %        | <i>L. amnigena</i> 98.29 %        |
| ERR1430553*             | GCA_938039995   | <i>L. amnigena</i>            | <i>L. amnigena</i> 54 %         | <i>L. amnigena</i> 99.15 %        |
| ERR1430553*             | GCA_905202905   | <i>L. amnigena</i>            | <i>L. amnigena</i> 57 %         | <i>L. amnigena</i> 99.20 %        |
| ERR5094855*             | GCA_947072025   | <i>L. amnigena</i>            | <i>L. amnigena</i> 100 %        | <i>L. amnigena</i> 98.32 %        |
| FDAARGOS 1444           | GCA_019047465   | <i>L. amnigena</i>            | <i>L. amnigena</i> 100 %        | <i>L. amnigena</i> 99.97 %        |
| FDAARGOS 1446           | GCA_019048185   | <i>L. amnigena</i>            | <i>L. amnigena</i> 100 %        | <i>L. amnigena</i> 98.32 %        |
| FDAARGOS_1445           | GCA_019355955   | <i>L. amnigena</i>            | <i>L. amnigena</i> 100 %        | <i>L. amnigena</i> 98.45 %        |
| FDAARGOS_395            | GCA_002393405   | <i>L. amnigena</i>            | <i>L. amnigena</i> 100 %        | <i>L. amnigena</i> 99.97 %        |
| INSAq176                | GCA_021441185   | <i>L. amnigena</i>            | <i>L. amnigena</i> 100 %        | <i>L. amnigena</i> 98.42 %        |
| JUb66                   | GCA_003752235   | <i>L. amnigena</i>            | <i>L. amnigena</i> 100 %        | <i>L. amnigena</i> 98.40 %        |
| P13                     | GCA_023970615   | <i>L. amnigena</i>            | <i>L. amnigena</i> 100 %        | <i>L. amnigena</i> 98.87 %        |
| PTJIIT1005              | GCA_022352085   | <i>L. amnigena</i>            | <i>L. amnigena</i> 100 %        | <i>L. amnigena</i> 98.85 %        |
| TZW12                   | GCA_016771075   | <i>L. amnigena</i>            | <i>L. amnigena</i> 100 %        | <i>L. amnigena</i> 98.45 %        |
| TZW13                   | GCA_016770995   | <i>L. amnigena</i>            | <i>L. amnigena</i> 100 %        | <i>L. amnigena</i> 98.30 %        |
| TZW14                   | GCA_016770935   | <i>L. amnigena</i>            | <i>L. amnigena</i> 100 %        | <i>L. amnigena</i> 98.24 %        |
| TZW15                   | GCA_016770975   | <i>L. amnigena</i>            | <i>L. amnigena</i> 100 %        | <i>L. amnigena</i> 98.42 %        |
| TZW16                   | GCA_016770955   | <i>L. amnigena</i>            | <i>L. amnigena</i> 100 %        | <i>L. amnigena</i> 98.42 %        |
| UMA3121                 | GCA_013337605   | <i>L. amnigena</i>            | <i>L. amnigena</i> 100 %        | <i>L. amnigena</i> 98.44 %        |
| ZB04                    | GCA_001652505   | <i>L. amnigena</i>            | <i>H. chinensis</i> 96 %        | <i>H. chinensis</i> 99.76 %       |

423 \*MAGs; full names ERR1430553\_bin.131\_CONCOCT\_v1.1\_MAG, ERR1430553-bin.48 and  
424 ERR5094855\_bin.4\_metaWRAP\_v1.3\_MAG.

425

426

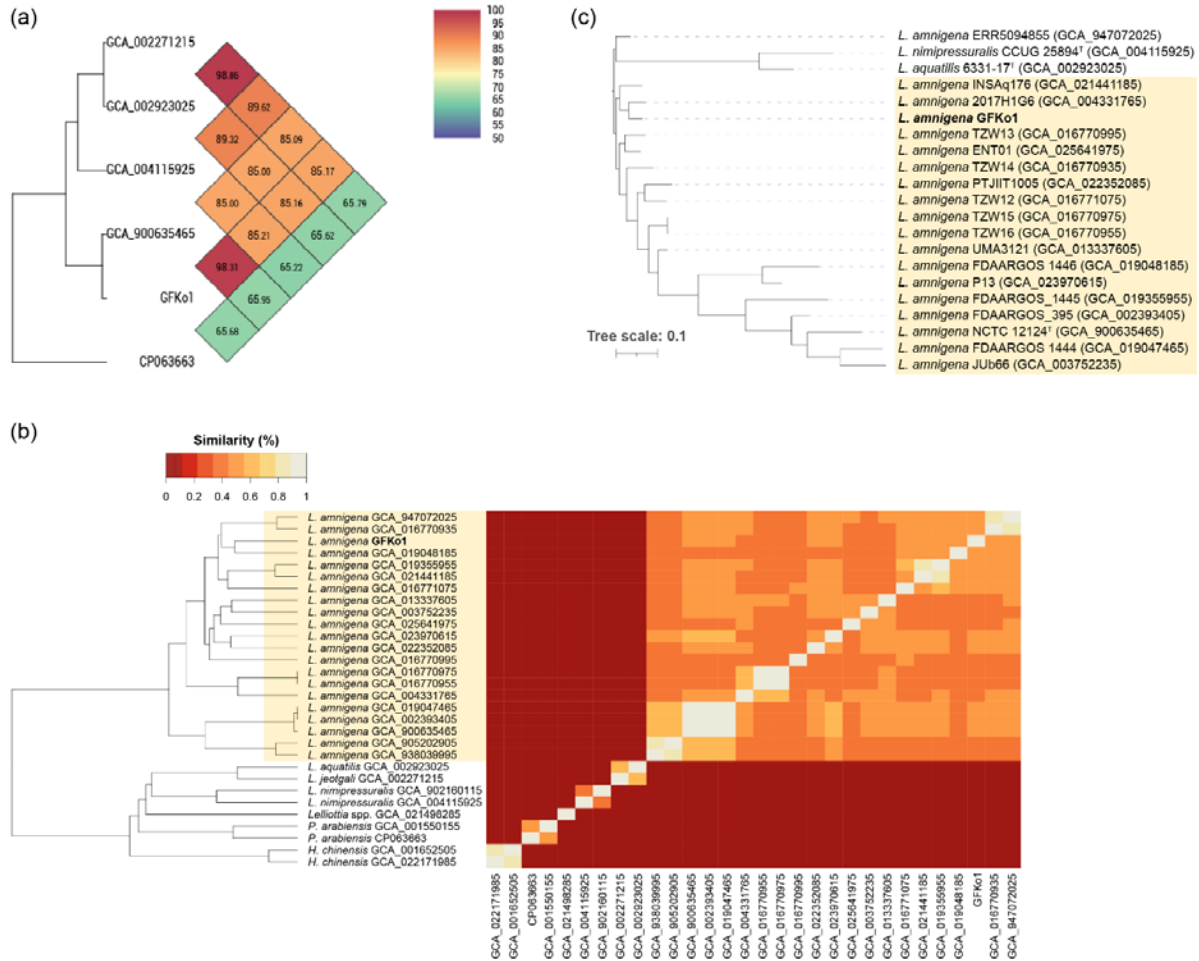

427

428

429 **Fig. 1.** Strain GFKo1 is a representative of *L. amnigena*. (a) Heatmap generated by  
 430 OAT:OrthoANI showing the ANI between GFKo1 and strains listed as type strains of  
 431 *Lelliottia* species with valid and non-valid names. GFKo1 shares highest ANI (%) with the  
 432 type strain of *L. amnigena* (accession assembly GCA\_900635465). (b) Heatmap with  
 433 unidirectional clustering showing the similarity of sourmash signatures across all genomes  
 434 included in this study. The lighter the colour of the block on the heatmap, the more similar  
 435 the two corresponding genome signatures. (c) RAXmL (best tree) generated by  
 436 PhyloPhlAn3 from the proteomes of high-quality (>90 % completeness, <5 % contamination;  
 437 **Table 1**) genome sequence data for the genus *Lelliottia*. The tree was rooted on the clade  
 438 containing *L. nimipressuralis* and *L. aquatilis*. Scale bar, average number of amino acid  
 439 substitutions per position. (b, c) The clade highlighted in light yellow represents *L. amnigena*  
 440 *sensu stricto*.

441

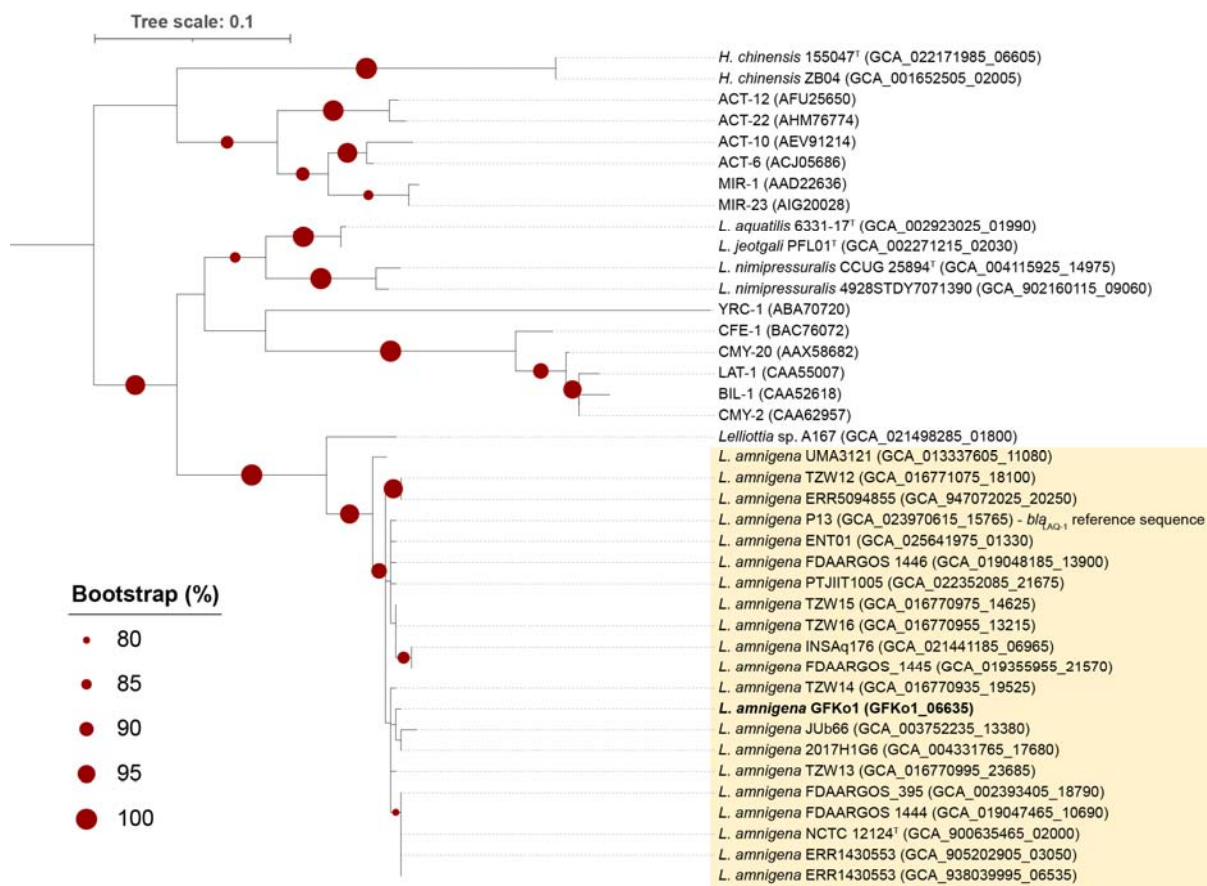

442

443

444 **Fig. 2.** *bla*<sub>LAQ</sub> is a core gene of *L. amnigena*. The *bla*<sub>LAQ-1</sub> sequence of *L. amnigena* P13  
 445 represents the reference for this chromosomally-encoded AmpC β-lactamase (Li *et al.*  
 446 2022). Twelve other AmpC β-lactamases (ACT-12, ACT-22, BIL-1, CMY-2, CMY-20, LAT-1,  
 447 CFE-1, YRC-1, MIR-1, MIR-23, ACT-6, ACT-10; (Li *et al.* 2022)) were included in the  
 448 analysis for comparative purposes; the accessions for the amino acid sequences of these  
 449 proteins are given in parentheses. The tree was rooted at the midpoint. Scale bar, average  
 450 number of amino acid substitutions per position. The clade in yellow highlights *L. amnigena*  
 451 *sensu stricto* sequences. Bootstrap values >80 % (based on 100 replications) are shown on  
 452 the tree. The multiple sequence alignment used to create this phylogenetic tree is available  
 453 as **Supplementary Material**.

454



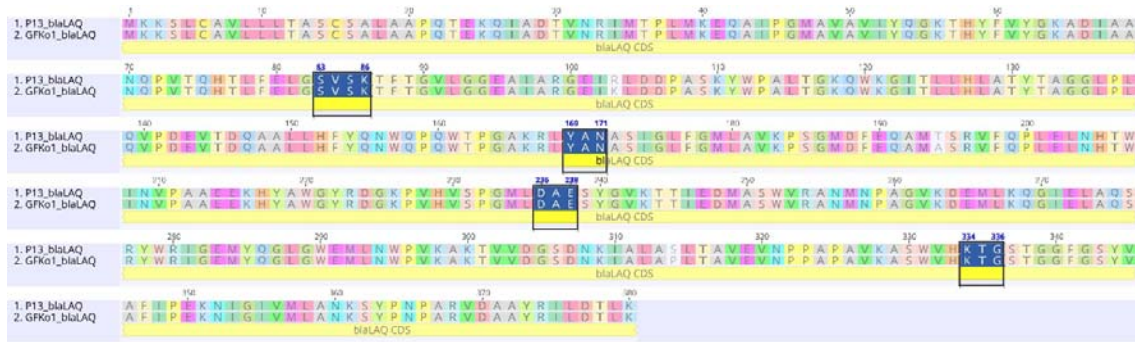

455

456

457

**Supplementary Fig 1.** Amino acid alignment of  $\beta$ -lactamase LAQ-1 from *L. amnigena* P13

458

(Accession QXM27670) with  $\beta$ -lactamase LAQ-1 from *L. amnigena* GFko1 (locus tag

459

GFko1\_06635). Conserved amino acid sequences typical for a class C  $\beta$ -lactamase are

460

highlighted in blue.

461

462

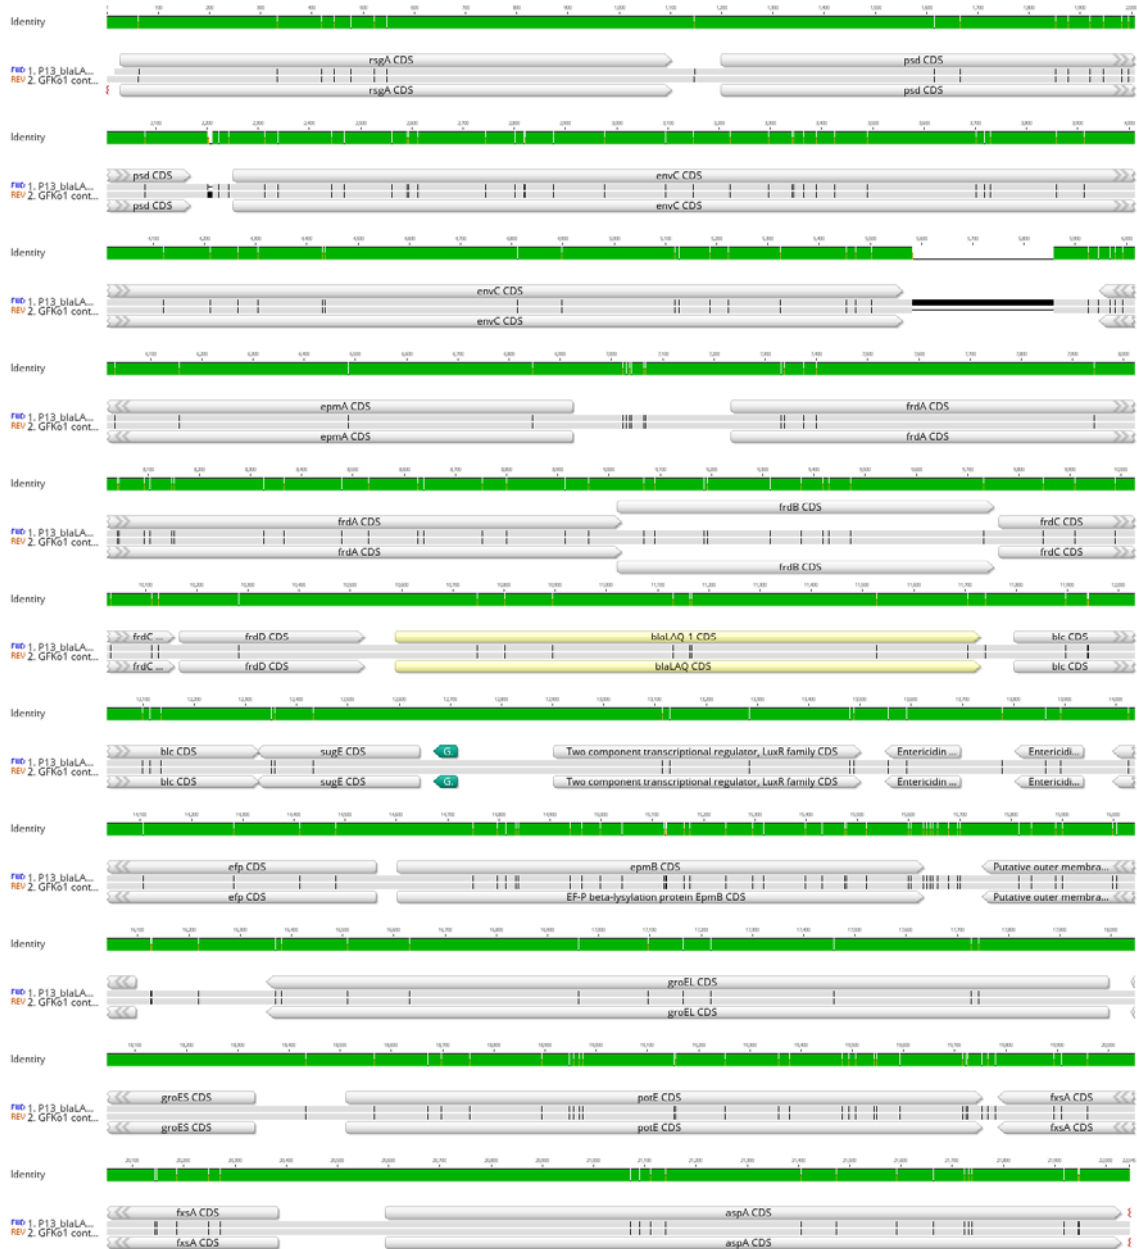

463

464

465 **Supplementary Fig. 2.** Alignment of *bla*<sub>LAQ-1</sub>-like and surrounding genome region of strain  
 466 GFKo1 with the same region of *L. amnigena* P13. Gene predictions and annotations were  
 467 made using Bakta as described in Methods. The sequence of GFKo1 was reverse-  
 468 complemented and the MAFFT alignment shown was created in Geneious Prime v2023.0.1.  
 469 The alignment covers 21,897 bp; the sequences share 21,497 identical sites (97.6 %  
 470 pairwise identity) at the nucleotide level. The region shown matches that analysed by (Li *et*  
 471 *al.* 2022); their analysis included sequence data from *L. amnigena* strains P13, NCTC  
 472 12124<sup>T</sup>, FDAARGOS 1444, FDAARGOS 1446, FDAARGOS\_1445 and FDAARGOS\_395.
